# Supplementary material for: Malting of Fusarium Head Blight-Infected Rye (Secale cereale): Growth of Fusarium graminearum, Trichothecene Production, and the Impact on Malt Quality
Source: Toxins (Basel). 2018 Sep 11;10(9):369. doi: 10.3390/toxins10090369 (PMC6162642; doi:10.3390/toxins10090369)
Supplement: Supplementary file 1 [file toxins-10-00369-s001.pdf]

# Supplementary Materials: Malting of Fusarium Head Blight Infected Rye (*Secale cereale*): Growth of *Fusarium graminearum*, Trichothecene Production, and the Impact on Malt Quality

Zhao Jin, James Gillespie, John Barr, Jochum J. Wiersma, Mark E. Sorrells, Steve Zwinger, Thomas Gross, Jaime Cumming, Gary C. Bergstrom, Robert Brueggeman, Richard D. Horsley and Paul B. Schwarz

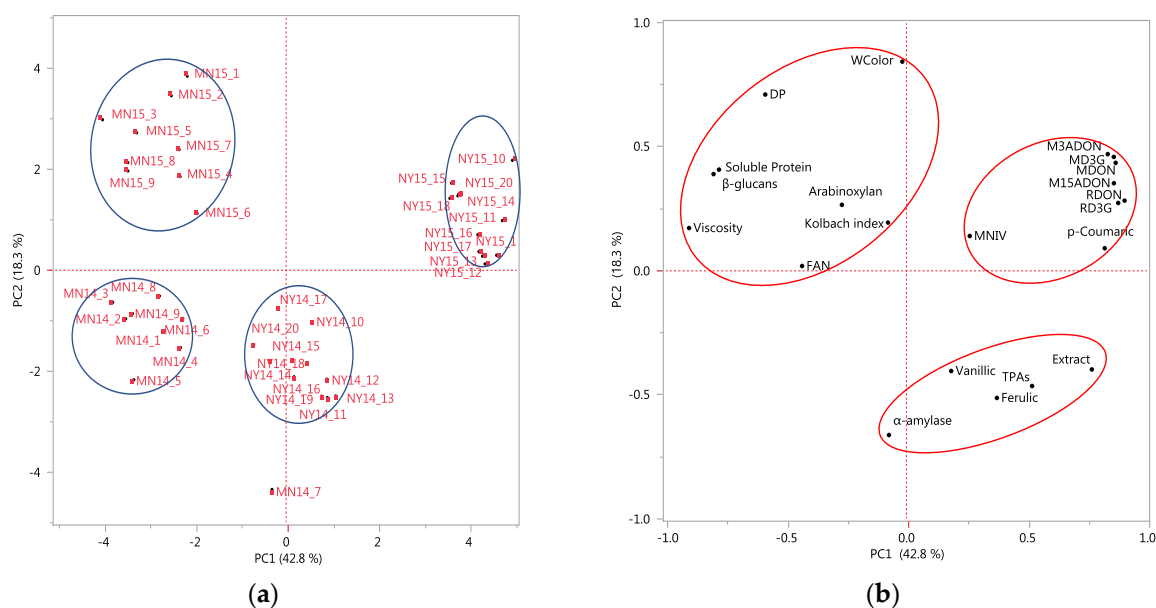

**Figure S1.** Principal component analysis (PCA) of rye cultivar and crop years (2014 and 2015) (a) Score plot, (b) loading plot. Codes in score plot a are location (MN or NY), crop year (2014 or 2015) and cultivar No. (1–20); there were 11 cultivars grown in NY for both 2014 and 2015, and nine other cultivars grown at Crookston of MN in both crop years. The R Code in loading plot b designates DON and D3G in rye, respectively. The M code designates DON, D3G, 3-ADON, 15-ADON and NIV in malt, respectively.

**Table S1.** Rye Samples utilized for the evaluation of the impact of FHB infection on malt quality (2014 and 2015 crops years).

| Variety and Type Number (n)<br>Total Samples (n = 117) | Variety by State                                                    |                                                                   |                                |
|--------------------------------------------------------|---------------------------------------------------------------------|-------------------------------------------------------------------|--------------------------------|
|                                                        | Minnesota <sup>a</sup> (n = 81)                                     | North Dakota <sup>b</sup> (n = 14)                                | New York <sup>c</sup> (n = 22) |
| Forage/Cover Crop (n=32) <sup>d</sup>                  | Aroostook, Elbon, Maton II,<br>Oklon, Wheeler and Wrens-<br>Abruzzi | Aroostook, Hancock and<br>Wheeler                                 | Aroostook                      |
| Conventional Grain (n = 42) <sup>d</sup>               | Dukato, Musketeer, Prima,<br>Rhymin, Spooner and Tulus <sup>e</sup> | AC Hazlet, Dacold, ND-Dylan,<br>Musketeer, Rhymin, and<br>Spooner | AC Hazlet and Danko            |
| Hybrid Grain (n = 43) <sup>f</sup>                     | A, B, C, D, E, and F                                                |                                                                   | G, H, I, J, K, L and M         |

<sup>a</sup> Variety trials in Crookston, Lamberton, Le Center and St Paul, MN. <sup>b</sup> Variety trials in Carrington and Minot, ND. <sup>c</sup> Variety trials in Ithaca, NY. <sup>d</sup> Open pollinated variety. <sup>e</sup> Tulus is a winter triticales. <sup>f</sup> The 13 hybrid cultivars and lines were obtained from commercial seed companies, and are identified by alphabetical designation only.

**Table S2.** Pearson correlations between malt quality and *Fusarium* Tri5 DNA content in a subset selected (n = 55) to represent the range in malt DON.

|                        | Rye Tri5 DNA | Malt Tri5 DNA |
|------------------------|--------------|---------------|
| <b>DNA</b>             |              |               |
| Rye Tri 5 DNA          | 1            |               |
| Malt Tri 5 DNA         | 0.74 ***     | 1             |
| <b>Trichothecenes</b>  |              |               |
| Rye DON                | 0.86 ***     | 0.64 ***      |
| Malt DON               | 0.83 ***     | 0.60 ***      |
| Malt D3G               | 0.80 ***     | 0.61 ***      |
| Malt 3-ADON            | 0.80 ***     | 0.54 ***      |
| Malt 15-ADON           | 0.63 ***     | 0.73 ***      |
| Malt NIV               | 0.53 ***     | 0.66 ***      |
| <b>Malt quality</b>    |              |               |
| Malt $\alpha$ -amylase |              |               |
| Malt DP                |              | 0.46 **       |
| Malt extract           |              |               |
| Wort viscosity         | −0.69 ***    | −0.67 ***     |
| Wort soluble protein   |              |               |
| Wort color             |              |               |
| Wort FAN               |              | 0.40 *        |
| Wort $\beta$ -glucan   |              |               |
| Wort arabinoxylan      |              | −0.40 *       |
| Wort ferulic acid      |              |               |
| Wort p-coumaric acid   | 0.70 ***     | 0.66 ***      |
| Wort vanillic acid     |              |               |
| Wort caffeic acid      | 0.67 ***     | 0.74 ***      |
| Total phenolic acid    | 0.48 **      |               |

\*, \*\* and \*\*\* indicate significant correlations at  $p \leq 0.01$ ,  $p \leq 0.001$  and  $p \leq 0.0001$ .
